# Supplementary material for: Facile synthesis of compact CdS–CuS heterostructures for optimal CO2-to-syngas photoconversion
Source: Royal Society of Chemistry journal article supplement (doi:10.1039/d2qi00097k), 2022-01-01
Supplement: d2qi00097k1.pdf [file d2qi00097k1.pdf]

## Supporting Information

for

### Facile synthesis of compact CdS–CuS heterostructures for optimal CO<sub>2</sub>–to–syngas photoconversion

Jian–Ying Xu<sup>a</sup>, Xiang–Ji Liu<sup>a</sup>, Han–Nan Huang<sup>a</sup>, Yu–Hang Xu<sup>a</sup>, Zhou Zhong<sup>a,\*</sup>, Ya–Feng Li<sup>b</sup>, Raymond Jianxiong Zeng<sup>a</sup>, Jian Lü<sup>a,b,c,\*</sup> and Rong Cao<sup>c</sup>

<sup>a</sup>Fujian Provincial Key Laboratory of Soil Environmental Health and Regulation, College of Resources and Environment, Fujian Agriculture and Forestry University, No. 15 Shang Xia Dian Road, Fuzhou 350002, P.R. China; <sup>b</sup>State Key Laboratory of Photocatalysis on Energy and Environment, Fuzhou University, No. 2 Xue Yuan Road, Fuzhou 350116, P.R. China; <sup>c</sup>State Key Laboratory of Structural Chemistry, Fujian Institute of Research on the Structure of Matter, Chinese Academy of Sciences, Fuzhou 350002, P.R. China.

\*E–mail: zhongzhou91@126.com (Z.Z.); jian\_lu\_fafu@163.com (J.L.)

*Number of tables: 6*

*Number of figures: 11*

## Table of Contents

|                                                                                                                           |    |
|---------------------------------------------------------------------------------------------------------------------------|----|
| <b>1. Supplementary Materials and Methods</b> .....                                                                       | 3  |
| 1.1 Reagents .....                                                                                                        | 3  |
| 1.2 Characterizations .....                                                                                               | 3  |
| <b>2. Supplementary tables</b> .....                                                                                      | 4  |
| <b>Table S1.</b> ICP–AES results of the CdS–CuS–x (x = 1/2/3/4/5). .....                                                  | 4  |
| <b>Table S2.</b> ICP–AES results of the CdS/CuS–x (x = 1/2/3/4/5). .....                                                  | 4  |
| <b>Table S3.</b> BET surface area results of the CdS, CdS–CuS–2, CdS/CuS–2 and CuS. ....                                  | 4  |
| <b>Table S4.</b> Rations of H <sub>2</sub> /CO of the CdS–CuS photocatalytic reduction of CO <sub>2</sub> to syngas. .... | 5  |
| <b>Table S5.</b> Rations of H <sub>2</sub> /CO of the CdS/CuS photocatalytic reduction of CO <sub>2</sub> to syngas. .... | 5  |
| <b>Table S6.</b> Comparison of various CdS–based catalysts for the photocatalytic CO <sub>2</sub> reduction. ....         | 6  |
| <b>3. Supplementary figures</b> .....                                                                                     | 7  |
| <b>Fig. S1.</b> Photographs of as–prepared materials. ....                                                                | 7  |
| <b>Fig. S2.</b> EDX spectrum of CdS–CuS–2. ....                                                                           | 7  |
| <b>Fig. S3.</b> PXRD of the as–prepared samples of CdS/CuS–x (x = 1/2/3/4/5). ....                                        | 7  |
| <b>Fig. S4.</b> SEM and TEM images. ....                                                                                  | 8  |
| <b>Fig. S5.</b> PXRD of the as–prepared and recycled samples of CdS–CuS–2. ....                                           | 8  |
| <b>Fig. S6.</b> TEM images of CdS–CuS–2 after the reaction. ....                                                          | 9  |
| <b>Fig. S7.</b> High–resolution XPS spectra of Cu 2p spectra of the as–prepared and recycled samples of CdS–CuS–2. ....   | 9  |
| <b>Fig. S8.</b> Mott–Schottky plots of CdS and CuS. ....                                                                  | 9  |
| <b>Fig. S9.</b> VB–XPS curves of CdS and CuS. ....                                                                        | 10 |
| <b>Fig. S10.</b> Time-resolved PL spectra of CdS, CuS, CdS–CuS–2 and CdS/CuS–2. ....                                      | 10 |
| <b>Fig. S11.</b> Transient photocurrent response of CdS, CdS–CuS–2, CdS/CuS–2 and CuS. ....                               | 11 |
| <b>4. Supplementary reference</b> .....                                                                                   | 12 |

## 1. Supplementary Materials and Methods

### 1.1 Reagents

All of the chemicals and solvents in this work were used as received without further purification. Thiourea was bought from Shanghai Macklin Biochemical Technology Co., Ltd. Triethanolamine (TEOA, 99.8%), acetonitrile (MeCN, 99.9%),  $\text{Cu}(\text{NO}_3)_2 \cdot 3\text{H}_2\text{O}$  and ethylene glycol (EG) were purchased from Sinopharm Chemical Reagent Co., Ltd. (China). Ethylenediamine (> 99.5%),  $\text{Cd}(\text{NO}_3)_2 \cdot 4\text{H}_2\text{O}$  and  $\text{Na}_2\text{SO}_4$  were purchased from Aladdin Ltd. (Shanghai, China).  $\text{Na}_2\text{S} \cdot 9\text{H}_2\text{O}$  (99.5%) was bought from Shanghai Titan Scientific Co., Ltd. Reaction solutions and stock solutions were prepared by using deionized water supplied with a UPT-I-5T ultrapure water system.

### 1.2 Characterizations

The crystal structure was characterized by X-ray powder diffraction (PXRD) by using a PANalytical X'PertPRO diffractometer (Cu radiation,  $\lambda = 0.154 \text{ nm}$ ) operated at 40 kV and 40 mA (PANalytical, Holland) in  $2\theta$  range of  $10\text{--}80^\circ$ . Scanning electron microscopy (SEM) images were photographed by using a SU8020 with a working voltage of 10 kV. Transmission electron microscopy (TEM) and high-resolution TEM (HR-TEM) images were recorded by using a Tecnai G2 F30 S-TWIN working at 200 kV. The inter-planer distances and the inverse Fast Fourier Transform (FFT) were calculated using the Digital Micrograph software. X-ray photoelectron spectroscopy (XPS) measurements were performed on a Thermo Fisher ESCALAB 250Xi spectrometer with Al  $K\alpha$  X-ray source (15 kV, 10 mA). In order to compensate effects related to charge shifts C 1s peak at 284.8 eV was used as internal standard. Diffuse reflectance spectra (DRS) were recorded on a Shimadzu UV-vis spectrophotometer (UV-2600) with  $\text{BaSO}_4$  as the background. The photoluminescence (PL) and time-resolved PL spectra were collected on a FLS 1000 fluorescence spectrometer at room temperature, moreover the excitation wavelength was 350 nm. Cd and Cu were determined using a Jobin Yvon Ultima2 inductively coupled plasma atomic emission spectrometer (ICP-AES). The specific surface area was determined by the Brunauer-Emmett-Teller (BET) method with  $\text{N}_2$  adsorption at 77 K (TriStar II 3020).

## 2. Supplementary Tables

**Table S1.** ICP–AES results of the CdS–CuS–*x* (*x* = 1/2/3/4/5).

| Composite photocatalyst | Cd (mol%) | Cu (mol%) | Cd : Cu (molar ratio) |
|-------------------------|-----------|-----------|-----------------------|
| CdS–CuS–1               | 46.0      | 10.5      | 1 : 0.23              |
| CdS–CuS–2               | 42.8      | 13.7      | 1 : 0.32              |
| CdS–CuS–3               | 37.6      | 18.7      | 1 : 0.5               |
| CdS–CuS–4               | 25.8      | 26.6      | 1 : 1.0               |
| CdS–CuS–5               | 6.45      | 55.0      | 1 : 8.5               |

**Table S2.** ICP–AES results of the CdS/CuS–*x* (*x* = 1/2/3/4/5).

| Composite photocatalyst | Cd (mol%) | Cu (mol%) | Cd : Cu (molar ratio) |
|-------------------------|-----------|-----------|-----------------------|
| CdS/CuS–1               | 63.6      | 8.6       | 1:0.14                |
| CdS/CuS–2               | 59.9      | 14.1      | 1:0.24                |
| CdS/CuS–3               | 55.9      | 20.3      | 1:0.36                |
| CdS/CuS–4               | 50.4      | 27.8      | 1:0.55                |
| CdS/CuS–5               | 42.1      | 41.2      | 1:0.97                |

**Table S3.** BET surface area results of the CdS, CdS–CuS–2, CdS/CuS–2 and CuS.

| Photocatalyst | BET surface area (m <sup>2</sup> g <sup>-1</sup> ) |
|---------------|----------------------------------------------------|
| CdS           | 25.2                                               |
| CuS           | 26.9                                               |
| CdS–CuS–2     | 26.4                                               |
| CdS/CuS–2     | 24.8                                               |

**Table S4.** Ratios of H<sub>2</sub>/CO of the CdS–CuS photocatalytic reduction of CO<sub>2</sub> to syngas.

| Composite photocatalyst | H <sub>2</sub> production rate (μmol·h <sup>-1</sup> ·g <sup>-1</sup> ) | CO production rate (μmol·h <sup>-1</sup> ·g <sup>-1</sup> ) | H <sub>2</sub> :CO |
|-------------------------|-------------------------------------------------------------------------|-------------------------------------------------------------|--------------------|
| CdS–CuS–1               | 1499.8                                                                  | 45.3                                                        | 33:1               |
| CdS–CuS–2               | 2416.5                                                                  | 203.4                                                       | 12:1               |
| CdS–CuS–3               | 1251.6                                                                  | 98.9                                                        | 13:1               |
| CdS–CuS–4               | 487.0                                                                   | 23.6                                                        | 21:1               |
| CdS–CuS–5               | 16.0                                                                    | 18.5                                                        | 1:1                |

**Table S5.** Ratios of H<sub>2</sub>/CO of the CdS/CuS photocatalytic reduction of CO<sub>2</sub> to syngas.

| Composite photocatalyst | H <sub>2</sub> production rate (μmol·h <sup>-1</sup> ·g <sup>-1</sup> ) | CO production rate (μmol·h <sup>-1</sup> ·g <sup>-1</sup> ) | H <sub>2</sub> :CO |
|-------------------------|-------------------------------------------------------------------------|-------------------------------------------------------------|--------------------|
| CdS/CuS–1               | 1213.0                                                                  | 13.5                                                        | 90:1               |
| CdS/CuS–2               | 1329.6                                                                  | 34.4                                                        | 39:1               |
| CdS/CuS–3               | 1319.2                                                                  | 33.9                                                        | 39:1               |
| CdS/CuS–4               | 1143.4                                                                  | 27.3                                                        | 42:1               |
| CdS/CuS–5               | 561.7                                                                   | 20.8                                                        | 27:1               |

**Table S6.** Comparison of various CdS-based catalysts for the photocatalytic CO<sub>2</sub> reduction.

| Photocatalyst                                                      | Sacrificial agent                                | CO production rate | CH <sub>4</sub> production rate | Reference |
|--------------------------------------------------------------------|--------------------------------------------------|--------------------|---------------------------------|-----------|
| ZnS/CdS/rGO                                                        | TEOA                                             | 9.69               | /                               | S1        |
| CdS/Ni(bpy) <sub>3</sub> Cl <sub>2</sub>                           | TEOA                                             | 46.9               | /                               | S2        |
| CdS/TiO <sub>2</sub>                                               | /                                                | 3.62               | /                               | S3        |
| CdS/CdV <sub>2</sub> O <sub>6</sub>                                | Na <sub>2</sub> S/Na <sub>2</sub> O <sub>3</sub> | /                  | 2.98                            | S4        |
| CdS/Ni <sub>9</sub> S <sub>8</sub> /Al <sub>2</sub> O <sub>3</sub> | TEOA                                             | 121                | /                               | S5        |
| CdS/NH <sub>2</sub> -UiO-66/chitosan                               | TEOA                                             | 96.98              | /                               | S6        |
| CdS/FeTCPP                                                         | TEOA                                             | 7.16               | /                               | S7        |
| Ni/CdS QDs                                                         | TEOA                                             | 9.5                | 1.1                             | S8        |
| NG/CdS                                                             | /                                                | 2.6                | 0.3                             | S9        |
| FeOOH/CdS                                                          | /                                                | 12.55              | 5.88                            | S10       |
| CdS-CuS                                                            | TEOA                                             | 203.4 ± 15.7       | 2.8 ± 0.3                       | this work |

### 3. Supplementary figures

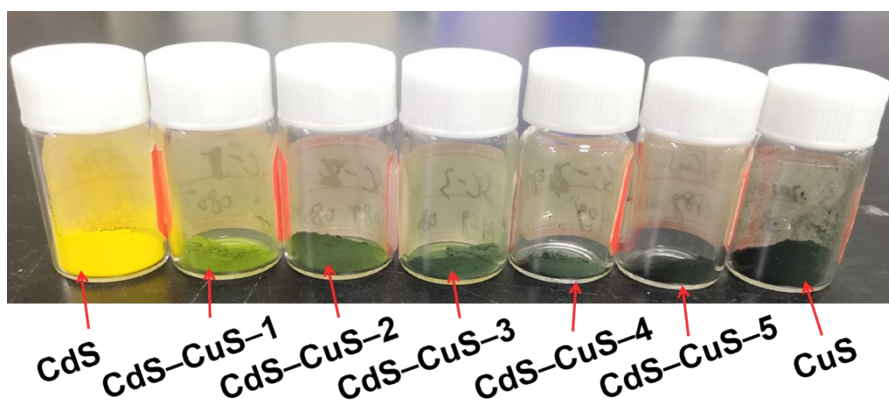

Fig. S1. Photographs of as-prepared materials.

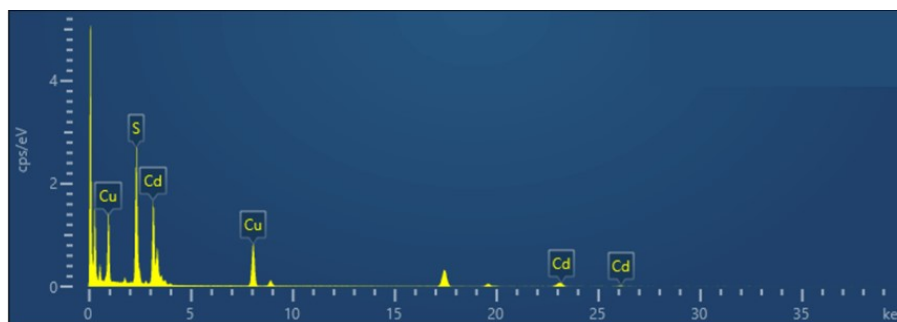

Fig. S2. EDX spectrum of CdS-CuS-2.

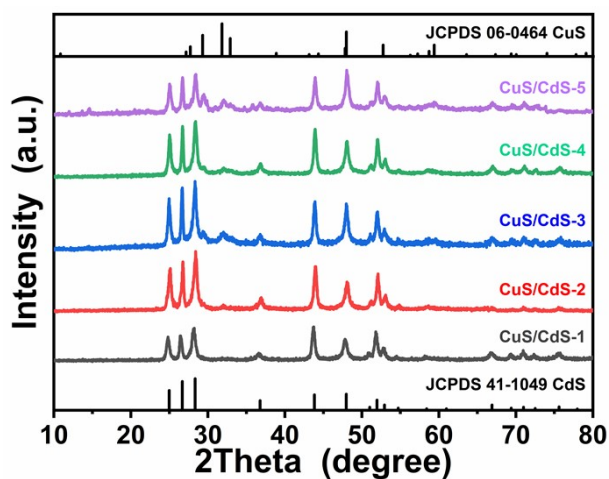

Fig. S3. PXRD of the as-prepared samples of CdS/CuS-x (x = 1/2/3/4/5).

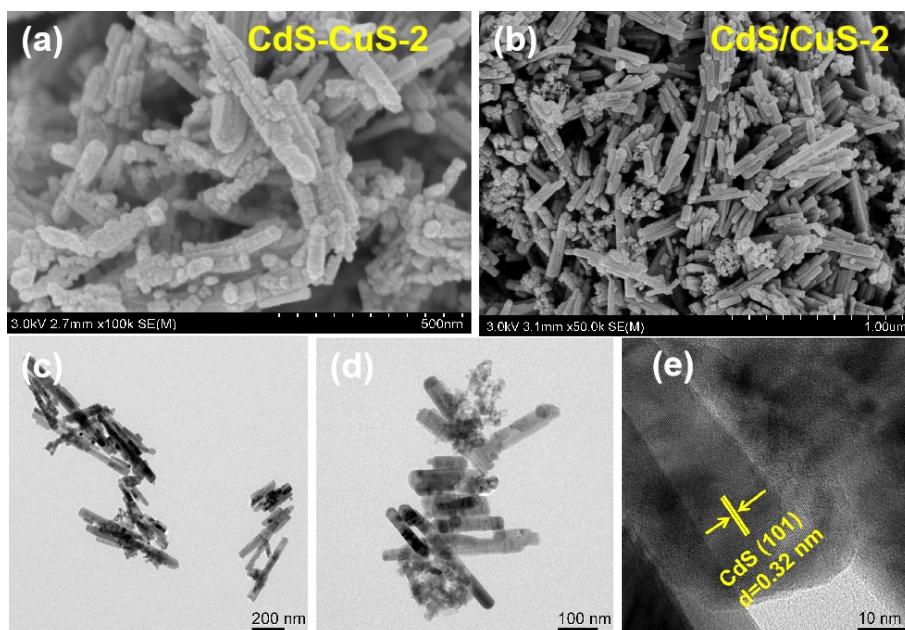

**Fig. S4.** (a) SEM images of CdS–CuS–2; (b) SEM images of CdS/CuS–2 (c, d) TEM images of CdS/CuS–2; (e) HRTEM of CdS/CuS–2.

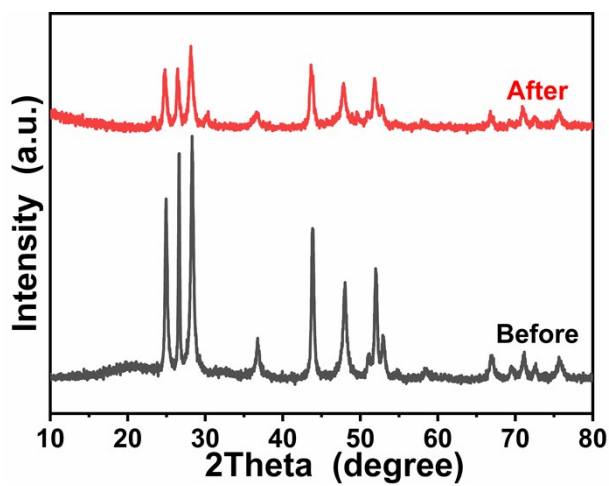

**Fig. S5.** PXRD of the as–prepared and recycled samples of CdS–CuS–2.



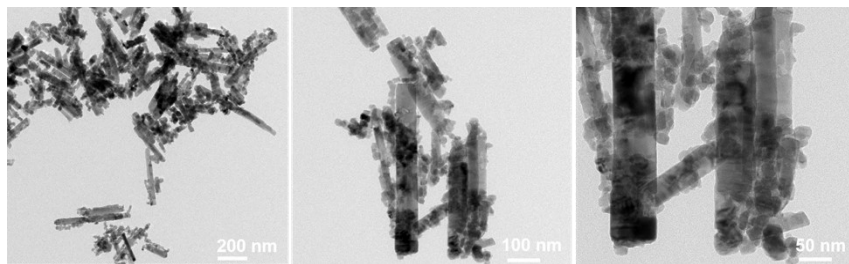

Fig. S6. TEM images of CdS-CuS-2 after photocatalytic reactions.

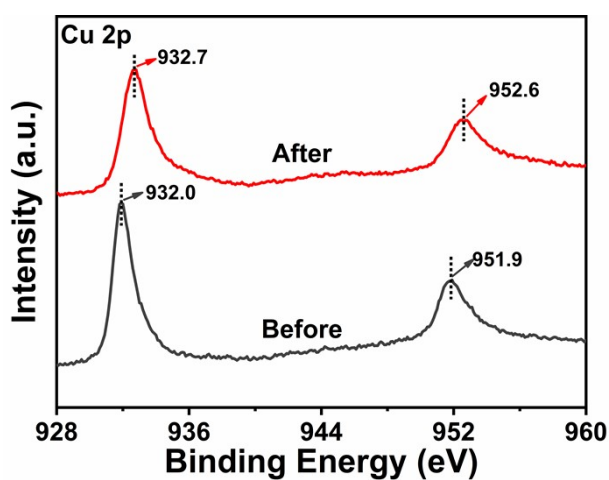

Fig. S7. High-resolution XPS spectra of Cu 2p spectra of the as-prepared and recycled samples of CdS-CuS-2.

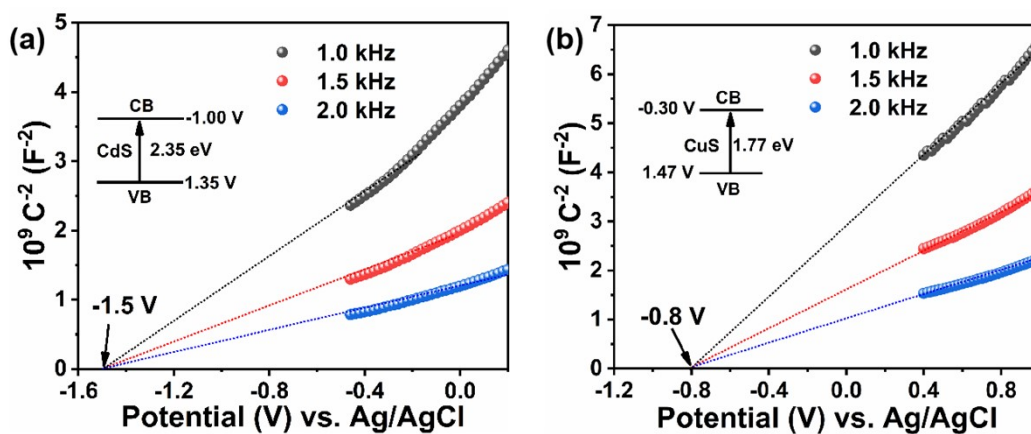

Fig. S8. Mott-Schottky plots of CdS (a) and CuS (b).

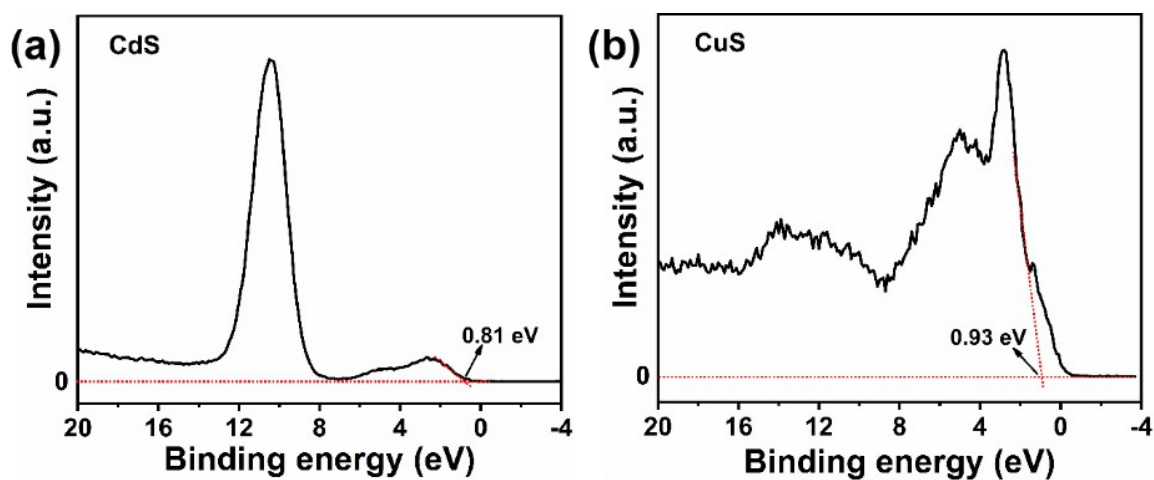

Fig. S9. VB-XPS curves of CdS (a) and CuS (b).

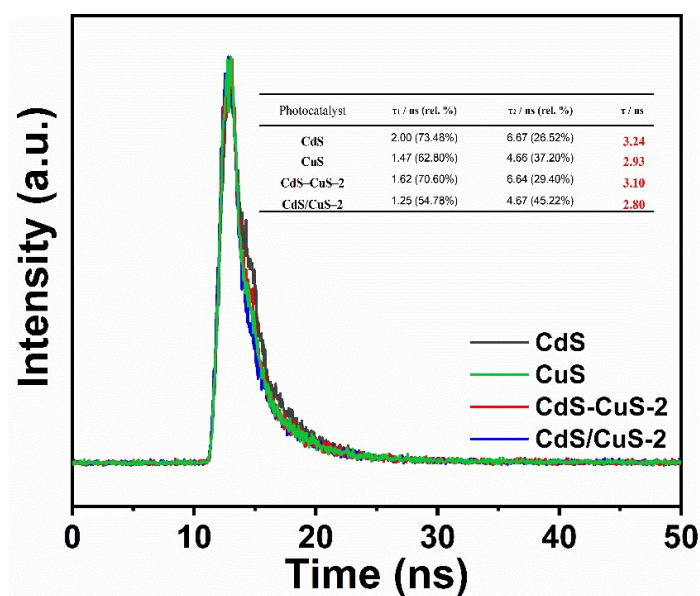

Fig. S10. Time-resolved PL spectra of CdS, CuS, CdS-CuS-2 and CdS/CuS-2.

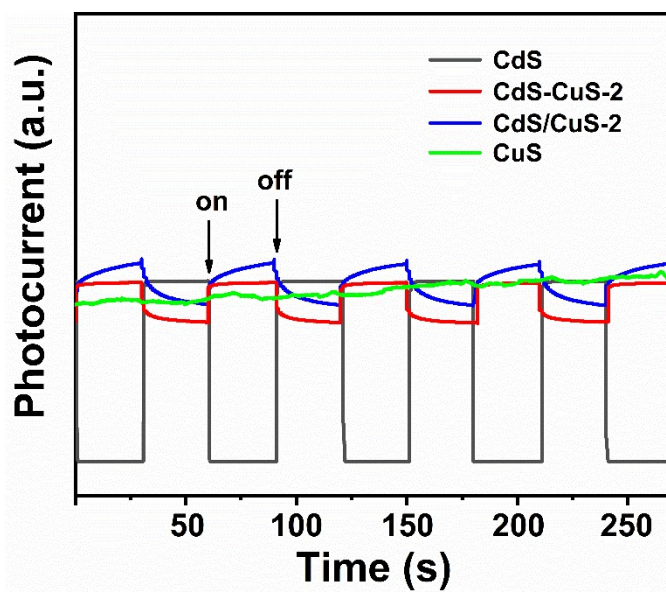

**Fig. S11.** Transient photocurrent response plots of CdS, CuS, CdS–CuS–2 and CdS/CuS–2.

#### 4. Supplementary reference

- S1. M. Xu, H. Jiang, X. Li, M. Gao, Q. Liu, H. Wang, P. Huo and S. Chen, Design of a ZnS/CdS/rGO composite nanosheet photocatalyst with multi-interface electron transfer for high conversion of CO<sub>2</sub>, *Sustainable Energy Fuels*, 2021, **5**, 4606–4617.
- S2. J. Lin, B. Qin and Z. Fang, Nickel Bipyridine (Ni(bpy)<sub>3</sub>Cl<sub>2</sub>) Complex used as molecular catalyst for photocatalytic CO<sub>2</sub> reduction, *Catal. Lett.*, 2019, **149**, 25–33.
- S3. X. Pan and Y.-J. Xu, Graphene-templated bottom-up fabrication of ultralarge binary CdS–TiO<sub>2</sub> nanosheets for photocatalytic selective reduction, *J. Phys. Chem. C*, 2015, **119**, 7184–7194.
- S4. S. Ijaz, M. F. Ehsan, M. N. Ashiq, N. Karamt, M. Najam-ul-Haq and T. He, Flower-like CdS/CdV<sub>2</sub>O<sub>6</sub> composite for visible-light photoconversion of CO<sub>2</sub> into CH<sub>4</sub>, *Mater. Des.*, 2016, **107**, 178–186.
- S5. S. Li, Q. Wang, X. Yan, H.-Q. Zhuang, C. Yuan, J. Feng, M. Wang, R. Li, W. Li and Y.-X. Pan, Al<sub>2</sub>O<sub>3</sub> support triggering highly efficient photoreduction of CO<sub>2</sub> with H<sub>2</sub>O on noble-metal-free CdS/Ni<sub>9</sub>S<sub>8</sub>/Al<sub>2</sub>O<sub>3</sub>, *Appl. Catal., B*, 2019, **240**, 174–181.
- S6. H. Zhao, X. Yang, R. Xu, J. Li, S. Gao and R. Cao, CdS/NH<sub>2</sub>-UiO-66 hybrid membrane reactors for the efficient photocatalytic conversion of CO<sub>2</sub>, *J. Mater. Chem. A*, 2018, **6**, 20152–20160.
- S7. P. Li, C. Hou, X. Zhang, Y. Chen and T. He, Ethylenediamine-functionalized CdS/tetra(4-carboxyphenyl)porphyrin iron(III) chloride hybrid system for enhanced CO<sub>2</sub> photoreduction, *Appl. Surf. Sci.*, 2018, **459**, 292–299.
- S8. J. Wang, T. Xia, L. Wang, X. Zheng, Z. Qi, C. Gao, J. Zhu, Z. Li, H. Xu and Y. Xiong, Enabling Visible-Light-Driven Selective CO<sub>2</sub> reduction by doping quantum dots: trapping electrons and suppressing H<sub>2</sub> evolution, *Angew. Chem., Int. Ed.*, 2018, **57**, 16447–16451.
- S9. C. Bie, B. Zhu, F. Xu, L. Zhang and J. Yu, In situ grown monolayer N-doped graphene on CdS hollow spheres with seamless contact for photocatalytic CO<sub>2</sub> reduction, *Adv. Mater.*, 2019, **31**, 1902868.
- S10. L. Li, C. Guo, J. Ning, Y. Zhong, D. Chen and Y. Hu, Oxygen-vacancy-assisted construction of FeOOH/CdS heterostructure as an efficient bifunctional photocatalyst for CO<sub>2</sub> conversion and water oxidation, *Appl. Catal., B*, 2021, **293**, 120203.
